# Supplementary material for: Modulation of Entrapment Efficiency and In Vitro Release Properties of BSA-Loaded Chitosan Microparticles Cross-Linked with Citric Acid as a Potential Protein–Drug Delivery System
Source: PubMed Central journal article supplement (PMC7216016; doi:10.3390/ma13081989), 2020-04-24
Supplement: materials-13-01989-s001.pdf [file materials-13-01989-s001.pdf]

Article

# Modulation of Entrapment Efficiency and *in Vitro* Release Properties of BSA-Loaded Chitosan Microparticles Cross-Linked with Citric Acid as a Potential Protein–Drug Delivery System

Natalia Sedyakina <sup>1</sup>, Andrey Kuskov <sup>2,\*</sup>, Kelly Velonia <sup>3</sup>, Nataliya Feldman <sup>1</sup>, Sergey Lutsenko <sup>1</sup>, and Grigory Avramenko <sup>2</sup>

<sup>1</sup> Department of Biotechnology, I.M. Sechenov First Moscow State Medical University (Sechenov University), Moscow 119991, Russia; nsedyakina@mail.ru (N.S.); n\_feldman@mail.ru (N.F.); svlutsenko57@mail.ru (S.L.)

<sup>2</sup> Department of Technology of Chemical Pharmaceutical and Cosmetic Substances, D. Mendeleev University of Chemical Technology of Russia, Moscow 125047, Russia; a\_n\_kuskov@mail.ru

<sup>3</sup> Department of Materials Science and Technology, University of Crete, Heraklion 70013, Greece; velonia@materials.uoc.gr

\* Correspondence: ankuskov@muctr.ru; Tel.: +7-499-972-4808

Received: 8 April 2020; Accepted: 21 April 2020; Published: 24 April 2020

**Supplementary Materials:**

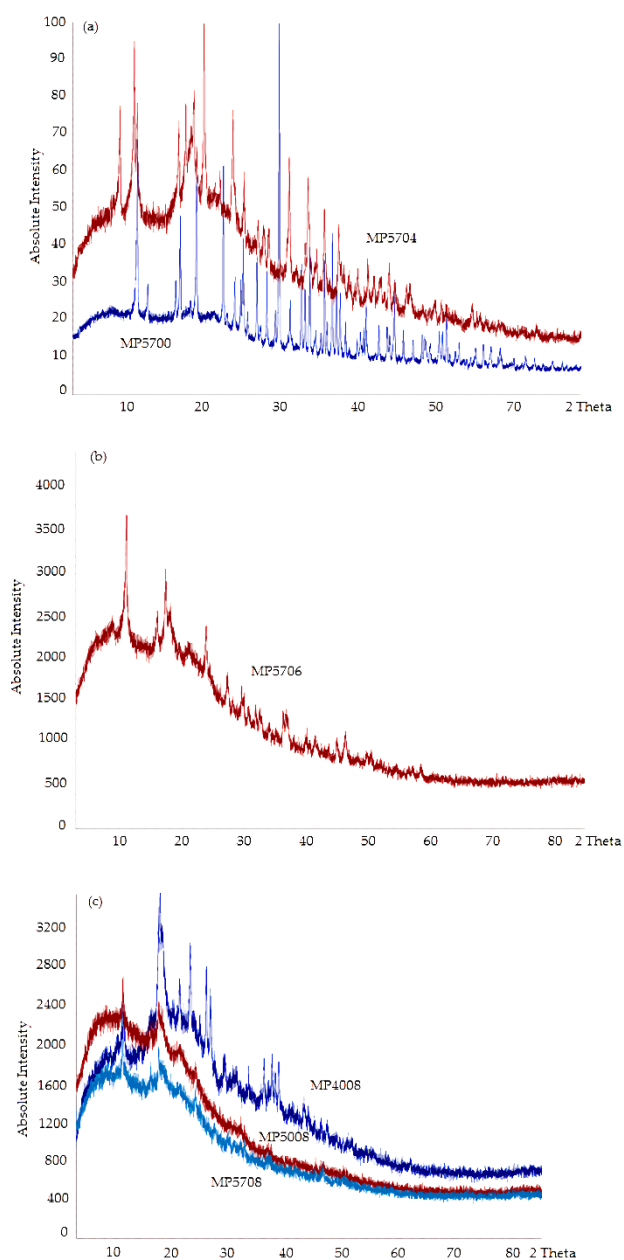

**Figure S1.** X-ray diffractograms of the chitosan microparticles: MP5700 and MP5704 (a), MP5706 (b), MP5708, MP5008 and MP4008 (c).

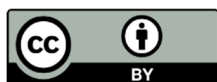

© 2020 by the authors. Submitted for possible open access publication under the terms and conditions of the Creative Commons Attribution (CC BY) license (<http://creativecommons.org/licenses/by/4.0/>).
